# Supplementary material
Source: publisher figshare collection journal article supplement (https://acs.figshare.com/ndownloader/files/5831133)
Supplement: Supplementary file 1 [file 5831133]

## Highly Diastereoselective Aldol Additions of a Chiral Ethyl Ketone Enolate Under Lewis Base Catalysis

Scott E. Denmark and Son M. Pham

*Roger Adams Laboratory, Department of Chemistry,  
University of Illinois, Urbana, Illinois 61801*

### SUPPORTING INFORMATION

#### General Experimental

All reactions were performed in oven and/or flame dried glassware under an atmosphere of dry nitrogen. Dichloromethane ( $\text{CH}_2\text{Cl}_2$ ) was distilled from  $\text{P}_2\text{O}_5$ , silicon tetrachloride was distilled immediately before use. Analytical thin-layer chromatography was performed on Merck silica gel plates with QF-254 indicator. Analytical supercritical fluid chromatography (SFC) was performed on a Berger Instruments<sup>1</sup> packed-column SFC with a built-in photometric detector ( $\lambda = 220 \text{ nm}$ ) using a Daicel Chiralpak AD and AS column, as indicated. Kugelrohr (bulb-to-bulb) distillations were performed on a Büchi GKR-50 Kugelrohr; boiling points (bp) correspond to uncorrected air-bath temperatures (ABT). All temperatures correspond to internal reaction temperatures measured by Teflon-coated thermocouples unless otherwise noted.

$^1\text{H}$  NMR spectra and  $^{13}\text{C}$  NMR spectra were recorded on a Varian Unity Inova 500 (500 MHz) spectrometer and a Varian Unity 500 (125 MHz) spectrometer, respectively. Spectra are referenced to residual chloroform ( $\delta = 7.26$ ,  $^1\text{H}$ ;  $\delta = 77.0$ ,  $^{13}\text{C}$ ). Chemical shifts are reported in ppm ( $\delta$ ); multiplicities are indicated by s (singlet), d (doublet), t (triplet), q (quartet), quint (quintet), sext (sextet), m (multiplet) and br (broad). Coupling constants,  $J$ , are reported in Hertz. Mass spectrometry was performed by the University of Illinois Mass Spectrometry Center. Data are reported in the form of  $m/z$  (intensity relative to base peak = 100). Infrared spectra (IR) were recorded on a Mattson Galaxy 5020 spectrophotometer. Peaks are reported in  $\text{cm}^{-1}$  with the indicated relative intensities: br (broad); s (strong, 67-100%); m (medium, 34-66%); w (weak, 0-33%). Optical rotations were obtained on a Jasco DIP-360 digital polarimeter and are reported

as follows:  $[\alpha]_D^T$  temperature (T), concentration ( $c = \text{g}/100 \text{ mL}$ ) and solvent. Elemental analyses were performed by the University of Illinois Microanalytical Service Laboratory.

### Literature Preparations

(*S*)-2-Hydroxy-*N*-methoxy-*N*-methylpropionamide (**6**)<sup>2</sup> was prepared according to a modified procedure of Luke and Morris.<sup>3</sup> (*S*)-2-Hydroxy-3-pentanone (**7**)<sup>4</sup> was prepared according the method of Paterson.<sup>2</sup> 3-Phenyl propynal was prepared from DMF according to the method of Journet and Cai.<sup>5</sup> Achiral phosphoramides **1** and chiral phosphoramides **2** were prepared according to the literature and used as analytically pure samples.<sup>6</sup>

### Experimental Procedures

(-)-(*S*)-(*Z*)-Trimethyl[1-((1-((dimethyl)-(1,1-dimethylethyl)silyl)oxy)ethyl)propenyl)oxy]silane (**4**)

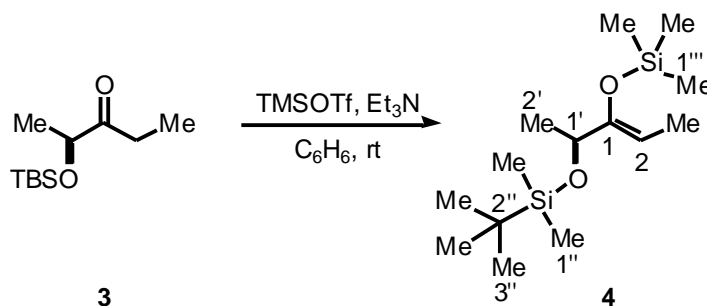

Trimethylsilyl trifluoromethanesulfonate (TMSOTf) (240  $\mu\text{L}$ , 1.32 mmol, 1.2.0 equiv) was dissolved in benzene (2 mL) at room temperature. Triethylamine (210  $\mu\text{L}$ , 1.65 mmol, 1.5 equiv) was carefully added via syringe and the entire solution was cooled in an ice bath. Silyloxy ketone **3** (232 mg, 1.1 mmol) was then added dropwise via syringe. The reaction was allowed to warm to room temperature and monitored by TLC. After 3 h, the biphasic mixture was quickly poured in to cold water (10 mL, 0 °C) with rapid stirring. The layers were separated and the aqueous phase was extracted with pentane (3  $\times$  5 mL). The combined organic extracts were then washed with brine (5 mL), dried over Na<sub>2</sub>SO<sub>4</sub>, filtered and concentrated to give a crude oil. The residue was distilled under reduced pressure to afford 288 mg (96%) of **4** as a clear, colorless oil, suitable for use in subsequent reactions. To obtain an analytically pure

sample, **4** was sacrificially purified by chromatography (SiO<sub>2</sub>, pentane/CH<sub>2</sub>Cl<sub>2</sub>, 6/1). The residue was again distilled under reduced pressure to afford 159 mg (53%) of analytically pure **4**.

Analytical data for **4**:

bp: 110 °C (0.1 mmHg, ABT)

<sup>1</sup>H NMR: (CDCl<sub>3</sub>, 500 MHz)

4.84 (qd, *J* = 6.6, 0.6, 1 H, HC(2)); 4.08 (q, *J* = 6.2, 1 H, HC(1')); 1.54 (dd, *J* = 6.6, 0.9, 3 H, H<sub>3</sub>C(3)); 1.25 (d, *J* = 6.2, 3 H, H<sub>3</sub>C(2')); 0.92 (s, 9 H, H<sub>3</sub>C(3'')); 0.23 (s, 9 H, H<sub>3</sub>C(1''')); 0.08, (d, *J* = 4.1, 6 H, H<sub>3</sub>C(1''))

<sup>13</sup>C NMR: (CDCl<sub>3</sub>, 125 MHz)

153.51 (C(1)); 101.54 (C(2)); 70.54 (C(1')); 25.92 (C(3'')); 22.15 (C(2')); 18.29 (C(2'')); 10.52 (C(3)); 0.67 (C(1''')); -4.70 (C(1'')); -4.98 (C(1''))

MS: (FI)

289 (M<sup>+</sup>+1, 27), 288 (M<sup>+</sup>, 100), 231 (4), 120 (2)

IR: (neat)

2958 (s), 2931 (s), 2858 (m), 1257 (s), 1119 (m), 1078 (m), 1049 (m), 837 (s), 777 (m)

Optical Rotation: [α]<sub>D</sub><sup>23</sup> -4.1° (*c* = 2.00, CHCl<sub>3</sub>)

Analysis: C<sub>14</sub>H<sub>32</sub>O<sub>2</sub>Si<sub>2</sub> (288.58)

Calculated: C, 58.27; H, 11.18%

Found: C, 58.11; H, 11.31%

**(S)-(Z)-Trichloro[(1-((1-((dimethyl)-(1,1-dimethylethyl)silyl)oxy)ethyl)propenyl)oxy]silane  
(5)**

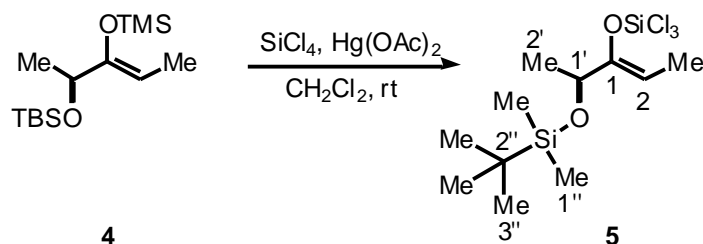

Mercuric acetate (32 mg, 0.1 mmol, 0.01 equiv) was suspended in  $\text{CH}_2\text{Cl}_2$  (10 mL) at room temperature. Silicon tetrachloride (2.3 mL, 20 mmol, 2.0 equiv) was then carefully added via syringe and the cloudy mixture was allowed to stir for several minutes. TMS enol ether **4** (2.7 g, 10 mmol) was then added dropwise via syringe. The reaction was allowed to stir at room temperature and could be monitored by careful removal of 10  $\mu\text{L}$  aliquots for  $^1\text{H}$  NMR analysis. After 18 h, the mercury salts were allowed to settle and the supernatant was carefully transferred to a dry 35 mL round bottom flask via cannula. The volatile components were removed at 100 mmHg and the residual oil was purified by distillation to afford 2.3 g (65%) of **5** as a 15/1 mixture of *Z/E* isomers by  $^1\text{H}$  NMR.

Analytical data for **5**:

bp: 150  $^\circ\text{C}$  (0.1 mmHg, ABT)

$^1\text{H}$  NMR: ( $\text{CDCl}_3$ , 500 MHz)

5.04 (q,  $J = 7.0$  1 H, HC(2), *Z*); 4.95 (q,  $J = 7.0$ , 1 H, HC(2), *E*); 4.21 (q,  $J = 6.8$ , 1 H, HC(1'), *Z*); 4.18 (q,  $J = 6.8$ , 1 H, HC(1'), *E*); 1.60 (d,  $J = 7.0$ , 3 H,  $\text{H}_3\text{C}(3)$ ); 1.31 (d,  $J = 6.8$ , 3 H,  $\text{H}_3\text{C}(2')$ ); 0.93 (s, 9 H,  $\text{H}_3\text{C}(3'')$ ); 0.07, (d,  $J = 4.1$ , 6 H,  $\text{H}_3\text{C}(1'')$ )

$^{13}\text{C}$  NMR: ( $\text{CDCl}_3$ , 125 MHz)

150.92 (C(1)); 108.30 (C(2)); 69.50 (C(1')); 25.75 (C(3'')); 22.15 (C(2')); 18.56 (C(2'')); 10.45 (C(3)); 0.65 (C(1'')); -4.71 (C(1'')); -5.01 (C(1''))

**Catalyzed Aldol Additions: General Procedure I**

**(+)-(2*S*,4*R*,5*S*)-5-Hydroxy-4-methyl-5-phenyl-2-[[[(dimethyl)-(1,1-dimethylethyl)silyl]oxy]-3-pentanone (8a)<sup>7</sup>** [Table 1, entry 1]

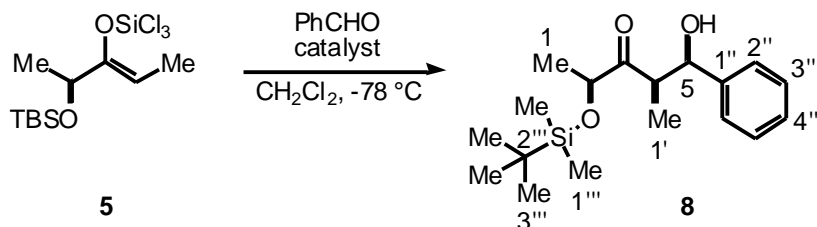

To a solution of 55 mg (0.15 mmol, 0.15 equiv) of (*R,R*)-**2a** in CH<sub>2</sub>Cl<sub>2</sub> (2.0 mL) was added quickly trichlorosilyl enolate **5** (350 mg, 1.0 mmol) and the solution was cooled to  $-78\text{ }^{\circ}\text{C}$ . Benzaldehyde (102  $\mu\text{L}$ , 1.0 mmol) was then added dropwise via syringe and the reaction mixture was allowed to stir at  $-78\text{ }^{\circ}\text{C}$  for 2 h. The reaction mixture was then poured into a rapidly stirring sat. aq. NaHCO<sub>3</sub> solution at  $0\text{ }^{\circ}\text{C}$  (30 mL) and was allowed to stir at room temperature for up to 6 h. The heterogeneous mixture was then filtered through Celite, the organic phase was separated and the aqueous phase was extracted with CH<sub>2</sub>Cl<sub>2</sub> ( $3 \times 15\text{ mL}$ ). The organic extracts were combined, dried over Na<sub>2</sub>SO<sub>4</sub>, filtered and concentrated to give a crude oil. Purification of the residue by silica gel chromatography (SiO<sub>2</sub>, pentane/Et<sub>2</sub>O, 6/1) afforded 284 mg (88%) of **8a** as a clear, colorless oil. The diastereomeric ratio was determined to have a relative dr of 16/1 and an internal dr of  $>50/1$  by SFC analysis.

**Analytical data for 8a:**

<sup>1</sup>H NMR: (CDCl<sub>3</sub>, 500 MHz)

7.38-7.20 (m, 5 H,  $2 \times \text{H}(\text{C}2'')$ ,  $2 \times \text{HC}(3'')$ ,  $\text{HC}(4'')$ ); 5.06 (dd,  $J = 5.0, 2.8, 1\text{ H}$ ,  $\text{HC}(5)$ , *syn,syn*); 5.01 (dd,  $J = 5.0, 2.8, 1\text{ H}$ ,  $\text{HC}(5)$ , *anti,syn*); 4.77 (dd,  $J = 8.5, 4.2, 1\text{ H}$ ,  $\text{HC}(5)$ , *anti-relative*); 4.73 (dd,  $J = 8.5, 4.2, 1\text{ H}$ ,  $\text{HC}(5)$ , *anti-relative*); 4.19 (q,  $J = 6.9, 1\text{ H}$ ,  $\text{HC}(2)$ ); 3.37 (dq,  $J = 7.2, 5.0, 1\text{ H}$ ,  $\text{HC}(4)$ ); 3.25, (d,  $J = 2.8, 1\text{ H}$ , OH); 1.27 (d,  $J = 6.9, 3\text{ H}$ ,  $\text{H}_3\text{C}(1)$ ); 1.05 (d,  $J = 7.2, 3\text{ H}$ ,  $\text{H}_3\text{C}(1')$ ); 0.90 (s, 9 H,  $\text{H}_3\text{C}(3''')$ ); 0.08 (s, 3 H,  $\text{H}_3\text{C}(1''')$ ); 0.06 (s, 3 H,  $\text{H}_3\text{C}(1''')$ )

TLC:  $R_f$  0.15 (pentane/Et<sub>2</sub>O, 6/1, anisaldehyde)

SFC:  $t_R$  (2*S*,4*R*,5*S*)-**8a**, 5.1 min (Daicel Chiralpak AD, 5% MeOH in CO<sub>2</sub>, 150 bar, 40 °C, 3.0 mL min<sup>-1</sup>)

(+)-(2*S*,4*R*,5*S*)-5-Hydroxy-4-methyl-5-phenyl-2-(((dimethyl)-(1,1-dimethylethyl)silyl)oxy]-3-pentanone (**8a**)<sup>7</sup> [Table 1, entry 2]

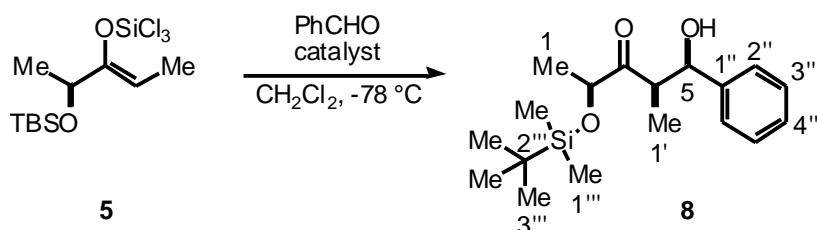

Following General Procedure I: from trichlorosilyl enolate **5** (350 mg, 1.0 mmol), (*S,S*)-**2a** (55 mg, 0.15 mmol, 0.15 equiv) in CH<sub>2</sub>Cl<sub>2</sub> (2.0 mL) and benzaldehyde (102  $\mu$ L, 1.0 mmol) was obtained after chromatography, 258 mg (80%) of **8a** as a clear, colorless oil. The diastereomeric ratio was determined to have a relative dr of 15/1 and an internal dr of 30/1 by SFC analysis.

Analytical data for **8a**:

<sup>1</sup>H NMR: (CDCl<sub>3</sub>, 500 MHz)

7.38-7.20 (m, 5 H, 2  $\times$  H(C2''), 2  $\times$  HC(3''), HC(4'')); 5.06 (dd,  $J$  = 5.0, 2.8, 1 H, HC(5), *syn, syn*); 5.01 (dd,  $J$  = 5.0, 2.8, 1 H, HC(5), *anti, syn*); 4.77 (dd,  $J$  = 8.5, 4.2, 1 H, HC(5), *anti*-relative); 4.73 (dd,  $J$  = 8.5, 4.2, 1 H, HC(5), *anti*-relative); 4.19 (q,  $J$  = 6.9, 1 H, HC(2)); 3.37 (dq,  $J$  = 7.2, 5.0, 1 H, HC(4)); 3.25, (d,  $J$  = 2.8, 1 H, OH); 1.27 (d,  $J$  = 6.9, 3 H, H<sub>3</sub>C(1)); 1.05 (d,  $J$  = 7.2, 3 H, H<sub>3</sub>C(1'')); 0.90 (s, 9 H, H<sub>3</sub>C(3''')); 0.08 (s, 3 H, H<sub>3</sub>C(1''')); 0.06 (s, 3 H, H<sub>3</sub>C(1'''))

TLC:  $R_f$  0.15 (pentane/Et<sub>2</sub>O, 6/1, anisaldehyde)

SFC:  $t_R$  (2*S*,4*R*,5*S*)-**8a**, 5.1 min (Daicel Chiralpak AD, 5% MeOH in CO<sub>2</sub>, 150 bar, 40 °C, 3.0 mL min<sup>-1</sup>)

**(+)-(2*S*,4*R*,5*S*)-5-Hydroxy-4-methyl-5-phenyl-2-(((dimethyl)-(1,1-dimethylethyl)silyl)oxy]-3-pentanone (**8a**)**<sup>7</sup> [Table 1, entry 3]

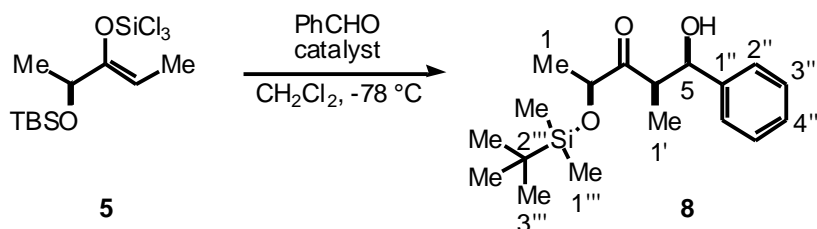

Following General Procedure I: from trichlorosilyl enolate **5** (350 mg, 1.0 mmol), (*R,R*)-**2b** (74 mg, 0.15 mmol, 0.15 equiv) in CH<sub>2</sub>Cl<sub>2</sub> (2.0 mL) and benzaldehyde (102  $\mu$ L, 1.0 mmol) was obtained after chromatography, 210 mg (65%) of **8a** as a clear, colorless oil. The diastereomeric ratio was determined to have a relative dr of 15/1 and an internal dr of 3/1 by SFC analysis.

**Analytical data for **8a**:**

**<sup>1</sup>H NMR:** (CDCl<sub>3</sub>, 500 MHz)

7.38-7.20 (m, 5 H, 2  $\times$  H(C2''), 2  $\times$  HC(3''), HC(4'')); 5.06 (dd, *J* = 5.0, 2.8, 1 H, HC(5), *syn,syn*); 5.01 (dd, *J* = 5.0, 2.8, 1 H, HC(5), *anti,syn*); 4.77 (dd, *J* = 8.5, 4.2, 1 H, HC(5), *anti*-relative); 4.73 (dd, *J* = 8.5, 4.2, 1 H, HC(5), *anti*-relative); 4.19 (q, *J* = 6.9, 1 H, HC(2)); 3.37 (dq, *J* = 7.2, 5.0, 1 H, HC(4)); 3.25, (d, *J* = 2.8, 1 H, OH); 1.27 (d, *J* = 6.9, 3 H, H<sub>3</sub>C(1)); 1.05 (d, *J* = 7.2, 3 H, H<sub>3</sub>C(1')); 0.90 (s, 9 H, H<sub>3</sub>C(3''')); 0.08 (s, 3 H, H<sub>3</sub>C(1''')); 0.06 (s, 3 H, H<sub>3</sub>C(1'''))

**TLC:** *R<sub>f</sub>* 0.15 (pentane/Et<sub>2</sub>O, 6/1, anisaldehyde)

**SFC:** *t<sub>R</sub>* (2*S*,4*R*,5*S*)-**8a**, 5.1 min (Daicel Chiralpak AD, 5% MeOH in CO<sub>2</sub>, 150 bar, 40 °C, 3.0 mL min<sup>-1</sup>)

**(+)-(2*S*,4*R*,5*S*)-5-Hydroxy-4-methyl-5-phenyl-2-(((dimethyl)-(1,1-dimethylethyl)silyl)oxy)-3-pentanone (8a)**<sup>7</sup> [Table 1, entry 4]



Following General Procedure I: from trichlorosilyl enolate **5** (350 mg, 1.0 mmol), **1a** (27 mg, 0.15 mmol, 0.15 equiv) in CH<sub>2</sub>Cl<sub>2</sub> (2.0 mL) and benzaldehyde (102 µL, 1.0 mmol) was obtained after chromatography, 245 mg (76%) of **8a** as a clear, colorless oil. The diastereomeric ratio was determined to have a relative dr of 15/1 and an internal dr of 34/1 by SFC analysis.

**Analytical data for 8a:**

<sup>1</sup>H NMR: (CDCl<sub>3</sub>, 500 MHz)

7.38-7.20 (m, 5 H, 2 × H(C2''), 2 × HC(3''), HC(4'')); 5.06 (dd, *J* = 5.0, 2.8, 1 H, HC(5), *syn,syn*); 5.01 (dd, *J* = 5.0, 2.8, 1 H, HC(5), *anti,syn*); 4.77 (dd, *J* = 8.5, 4.2, 1 H, HC(5), *anti-relative*); 4.73 (dd, *J* = 8.5, 4.2, 1 H, HC(5), *anti-relative*); 4.19 (q, *J* = 6.9, 1 H, HC(2)); 3.37 (dq, *J* = 7.2, 5.0, 1 H, HC(4)); 3.25, (d, *J* = 2.8, 1 H, OH); 1.27 (d, *J* = 6.9, 3 H, H<sub>3</sub>C(1)); 1.05 (d, *J* = 7.2, 3 H, H<sub>3</sub>C(1')); 0.90 (s, 9 H, H<sub>3</sub>C(3''')); 0.08 (s, 3 H, H<sub>3</sub>C(1''')); 0.06 (s, 3 H, H<sub>3</sub>C(1'''))

**TLC:** *R<sub>f</sub>* 0.15 (pentane/Et<sub>2</sub>O, 6/1, anisaldehyde)

**SFC:** *t<sub>R</sub>* (2*S*,4*R*,5*S*)-**8a**, 5.1 min (Daicel Chiralpak AD, 5% MeOH in CO<sub>2</sub>, 150 bar, 40 °C, 3.0 mL min<sup>-1</sup>)



**(+)-(2*S*,4*R*,5*S*)-5-Hydroxy-4-methyl-5-phenyl-2-(((dimethyl)-(1,1-dimethylethyl)silyl)oxy)-3-pentanone (8a)**<sup>7</sup> [Table 1, entry 5]



Following General Procedure I: from trichlorosilyl enolate **5** (350 mg, 1.0 mmol), **1b** (33 mg, 0.15 mmol, 0.15 equiv) in CH<sub>2</sub>Cl<sub>2</sub> (2.0 mL) and benzaldehyde (102 µL, 1.0 mmol) was obtained after chromatography, 245 mg (76%) of **8a** as a clear, colorless oil. The diastereomeric ratio was determined to have a relative dr of 15/1 and an internal dr of 37/1 by SFC analysis.

**Analytical data for 8a:**

**<sup>1</sup>H NMR:** (CDCl<sub>3</sub>, 500 MHz)

7.38-7.20 (m, 5 H, 2 × H(C2''), 2 × HC(3''), HC(4'')); 5.06 (dd, *J* = 5.0, 2.8, 1 H, HC(5), *syn,syn*); 5.01 (dd, *J* = 5.0, 2.8, 1 H, HC(5), *anti,syn*); 4.77 (dd, *J* = 8.5, 4.2, 1 H, HC(5), *anti-relative*); 4.73 (dd, *J* = 8.5, 4.2, 1 H, HC(5), *anti-relative*); 4.19 (q, *J* = 6.9, 1 H, HC(2)); 3.37 (dq, *J* = 7.2, 5.0, 1 H, HC(4)); 3.25, (d, *J* = 2.8, 1 H, OH); 1.27 (d, *J* = 6.9, 3 H, H<sub>3</sub>C(1)); 1.05 (d, *J* = 7.2, 3 H, H<sub>3</sub>C(1')); 0.90 (s, 9 H, H<sub>3</sub>C(3''')); 0.08 (s, 3 H, H<sub>3</sub>C(1''')); 0.06 (s, 3 H, H<sub>3</sub>C(1'''))

**TLC:** *R<sub>f</sub>* 0.15 (pentane/Et<sub>2</sub>O, 6/1, anisaldehyde)

**SFC:** *t<sub>R</sub>* (2*S*,4*R*,5*S*)-**8a**, 5.1 min (Daicel Chiralpak AD, 5% MeOH in CO<sub>2</sub>, 150 bar, 40 °C, 3.0 mL min<sup>-1</sup>)

**(+)-(2*S*,4*R*,5*S*)-5-Hydroxy-4-methyl-5-phenyl-2-(((dimethyl)-(1,1-dimethylethyl)silyl)oxy]-3-pentanone (**8a**)**<sup>7</sup> [Table 1, entry 6]



Following General Procedure I: from trichlorosilyl enolate **5** (350 mg, 1.0 mmol), **1c** (51 mg, 0.15 mmol, 0.15 equiv) in CH<sub>2</sub>Cl<sub>2</sub> (2.0 mL) and benzaldehyde (102 µL, 1.0 mmol) was obtained after chromatography, 216 mg (67%) of **8a** as a clear, colorless oil. The diastereomeric ratio was determined to have a relative dr of 15/1 and an internal dr of 3/1 by SFC analysis.

**Analytical data for **8a**:**

**<sup>1</sup>H NMR:** (CDCl<sub>3</sub>, 500 MHz)

7.38-7.20 (m, 5 H, 2 × H(C2''), 2 × HC(3''), HC(4'')); 5.06 (dd, *J* = 5.0, 2.8, 1 H, HC(5), *syn,syn*); 5.01 (dd, *J* = 5.0, 2.8, 1 H, HC(5), *anti,syn*); 4.77 (dd, *J* = 8.5, 4.2, 1 H, HC(5), *anti-relative*); 4.73 (dd, *J* = 8.5, 4.2, 1 H, HC(5), *anti-relative*); 4.19 (q, *J* = 6.9, 1 H, HC(2)); 3.37 (dq, *J* = 7.2, 5.0, 1 H, HC(4)); 3.25, (d, *J* = 2.8, 1 H, OH); 1.27 (d, *J* = 6.9, 3 H, H<sub>3</sub>C(1)); 1.05 (d, *J* = 7.2, 3 H, H<sub>3</sub>C(1')); 0.90 (s, 9 H, H<sub>3</sub>C(3''')); 0.08 (s, 3 H, H<sub>3</sub>C(1''')); 0.06 (s, 3 H, H<sub>3</sub>C(1'''))

**TLC:** *R<sub>f</sub>* 0.15 (pentane/Et<sub>2</sub>O, 6/1, anisaldehyde)

**SFC:** *t<sub>R</sub>* (2*S*,4*R*,5*S*)-**8a**, 5.1 min (Daicel Chiralpak AD, 5% MeOH in CO<sub>2</sub>, 150 bar, 40 °C, 3.0 mL min<sup>-1</sup>)

**(+)-(2*S*,4*R*,5*S*)-5-Hydroxy-4-methyl-5-phenyl-2-(((dimethyl)-(1,1-dimethylethyl)silyl)oxy]-3-pentanone (**8a**)**<sup>7</sup> [Table 1, entry 7]



Following General Procedure I: from trichlorosilyl enolate **5** (350 mg, 1.0 mmol), HMPA (26  $\mu$ L, 0.15 mmol, 0.15 equiv) in CH<sub>2</sub>Cl<sub>2</sub> (2.0 mL) and benzaldehyde (102  $\mu$ L, 1.0 mmol) was obtained after chromatography, 255 mg (79%) of **8a** as a clear, colorless oil. The diastereomeric ratio was determined to have a relative dr of 15/1 and an internal dr of 30/1 by SFC analysis.

**Analytical data for **8a**:**

<sup>1</sup>H NMR: (CDCl<sub>3</sub>, 500 MHz)

7.38-7.20 (m, 5 H, 2  $\times$  H(C2''), 2  $\times$  HC(3''), HC(4'')); 5.06 (dd,  $J$  = 5.0, 2.8, 1 H, HC(5), *syn, syn*); 5.01 (dd,  $J$  = 5.0, 2.8, 1 H, HC(5), *anti, syn*); 4.77 (dd,  $J$  = 8.5, 4.2, 1 H, HC(5), *anti*-relative); 4.73 (dd,  $J$  = 8.5, 4.2, 1 H, HC(5), *anti*-relative); 4.19 (q,  $J$  = 6.9, 1 H, HC(2)); 3.37 (dq,  $J$  = 7.2, 5.0, 1 H, HC(4)); 3.25, (d,  $J$  = 2.8, 1 H, OH); 1.27 (d,  $J$  = 6.9, 3 H, H<sub>3</sub>C(1)); 1.05 (d,  $J$  = 7.2, 3 H, H<sub>3</sub>C(1')); 0.90 (s, 9 H, H<sub>3</sub>C(3''')); 0.08 (s, 3 H, H<sub>3</sub>C(1''')); 0.06 (s, 3 H, H<sub>3</sub>C(1'''))

**TLC**:  $R_f$  0.15 (pentane/Et<sub>2</sub>O, 6/1, anisaldehyde)

**SFC**:  $t_R$  (2*S*,4*R*,5*S*)-**8a**, 5.1 min (Daicel Chiralpak AD, 5% MeOH in CO<sub>2</sub>, 150 bar, 40 °C, 3.0 mL min<sup>-1</sup>)

**Catalyzed Aldol Additions: General Procedure II**

**(+)-(2*S*,4*R*,5*S*)-5-Hydroxy-4-methyl-5-phenyl-2-[[[(dimethyl)-(1,1-dimethylethyl)silyl]oxy]-3-pentanone (**8a**)**<sup>7</sup> [Table 3, entry 1]

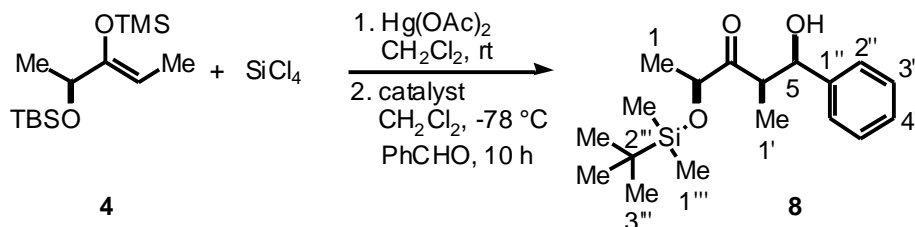

Silyl enol ether **4** (273 mg, 1.0 mmol) was added quickly to a stirred suspension of silicon tetrachloride (230  $\mu\text{L}$ , 2.0 mmol, 2.0 equiv) and mercuric acetate (3.2 mg, 0.01 mmol, 0.01 equiv) in  $\text{CH}_2\text{Cl}_2$  (1.0 mL) at room temperature. After addition, the mixture was stirred at room temperature for 18 h, then the volatile components were removed under reduced pressure (0.1 mmHg) to give a cloudy oil. A solution of (*R,R*)-**2a** (18 mg, 0.05 mmol, 0.05 equiv) in  $\text{CH}_2\text{Cl}_2$  (2.0 mL) was then added via cannula and the mixture was cooled to  $-78\text{ }^\circ\text{C}$ . Benzaldehyde (102  $\mu\text{L}$ , 1.0 mmol) was then added dropwise via syringe and the reaction mixture was allowed to stir at  $-78\text{ }^\circ\text{C}$  for 10 h. The reaction mixture was then poured into a rapidly stirring sat. aq.  $\text{NaHCO}_3$  solution (30 mL) submerged in an ice bath and was allowed to stir at room temperature for 6 h. The heterogeneous mixture was then filtered through Celite, the organic phase was separated and the aqueous phase was extracted with  $\text{CH}_2\text{Cl}_2$  ( $3 \times 15\text{ mL}$ ). The organic extracts were combined, dried over  $\text{Na}_2\text{SO}_4$ , filtered and concentrated to give a crude oil. Purification by silica gel chromatography ( $\text{SiO}_2$ , pentane/ $\text{Et}_2\text{O}$ , 6/1) afforded 284 mg (88%) of **8a** as a clear, colorless oil. The diastereomeric ratio was determined to be (*syn,syn*)-**8a**/minor isomers, 95/5 by SFC analysis.

Analytical data for **8a**:<sup>1</sup>H NMR: (CDCl<sub>3</sub>, 500 MHz)

7.38-7.20 (m, 5 H, 2 × H(C2''), 2 × HC(3''), HC(4'')); 5.06 (dd, J = 5.0, 2.8, 1 H, HC(5), *syn,syn*); 5.01 (dd, J = 5.0, 2.8, 1 H, HC(5), *anti,syn*); 4.77 (dd, J = 8.5, 4.2, 1 H, HC(5), *anti*-relative); 4.73 (dd, J = 8.5, 4.2, 1 H, HC(5), *anti*-relative); 4.19 (q, J = 6.9, 1 H, HC(2)); 3.37 (dq, J = 7.2, 5.0, 1 H, HC(4)); 3.25, (d, J = 2.8, 1 H, OH); 1.27 (d, J = 6.9, 3 H, H<sub>3</sub>C(1)); 1.05 (d, J = 7.2, 3 H, H<sub>3</sub>C(1')); 0.90 (s, 9 H, H<sub>3</sub>C(3''')); 0.08 (s, 3 H, H<sub>3</sub>C(1''')); 0.06 (s, 3 H, H<sub>3</sub>C(1'''))

<sup>13</sup>C NMR: (CDCl<sub>3</sub>, 125 MHz)

218.73 (C(3)); 141.72 (C(1'')); 128.21 (C(3'')); 127.21 (C(4'')); 125.95 (C(2'')); 74.61 (C(2)); 72.80 (C(5)); 46.91 (C(4)); 25.70 (C(3''')); 21.05 (C(1)); 18.03 (C(8)); 10.40 (C(1')); -4.74 (C(1''')); -5.01 (C(1'''))

TLC: R<sub>f</sub> 0.15 (pentane/Et<sub>2</sub>O, 6/1, anisaldehyde)

SFC: t<sub>R</sub> (2*S*,4*R*,5*S*)-**8a**, 5.1 min (Daicel Chiralpak AD, 5% MeOH in CO<sub>2</sub>, 150 bar, 40 °C, 3.0 mL min<sup>-1</sup>)

(+)-(2*S*,4*R*,5*S*)-5-Hydroxy-4-methyl-5-phenyl-2-(((dimethyl)-(1,1-dimethylethyl)silyl)oxy)-3-pentanone (**8a**)<sup>7</sup> [Table 3, entry 2]

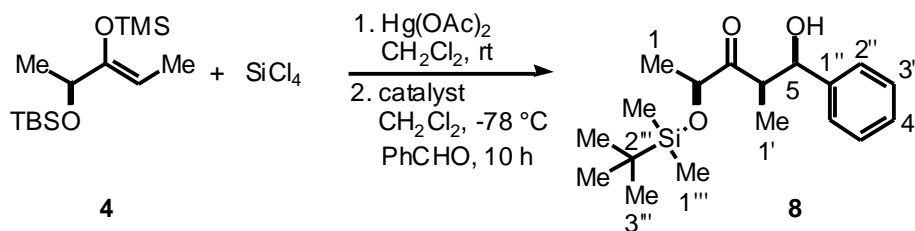

Following General Procedure II: from silyl enol ether **4** (273 mg, 1.0 mmol), silicon tetrachloride (230 μL, 2.0 mmol, 2.0 equiv) and mercuric acetate (3.2 mg, 0.01 mmol, 0.01 equiv) in CH<sub>2</sub>Cl<sub>2</sub> (1.0 mL) followed by HMPA (26 μL, 0.15 mmol, 0.15 equiv) in CH<sub>2</sub>Cl<sub>2</sub> (2.0 mL) and benzaldehyde (102 μL, 1.0 mmol) was obtained after chromatography, 281 mg (87%)

of **8a** as a clear, colorless oil. The diastereomeric ratio was determined to be (*syn,syn*)-**8a**/minor isomers, 94/2/2 by SFC analysis.

Analytical data for **8b**:

$^1\text{H}$  NMR: ( $\text{CDCl}_3$ , 500 MHz)

7.38-7.20 (m, 5 H,  $2 \times \text{H}(\text{C}2'')$ ,  $2 \times \text{HC}(\text{C}3'')$ ,  $\text{HC}(\text{C}4'')$ ); 5.06 (dd,  $J = 5.0, 2.8$ , 1 H,  $\text{HC}(\text{C}5)$ , *syn,syn*); 5.01 (dd,  $J = 5.0, 2.8$ , 1 H,  $\text{HC}(\text{C}5)$ , *anti,syn*); 4.77 (dd,  $J = 8.5, 4.2$ , 1 H,  $\text{HC}(\text{C}5)$ , *anti-relative*); 4.73 (dd,  $J = 8.5, 4.2$ , 1 H,  $\text{HC}(\text{C}5)$ , *anti-relative*); 4.19 (q,  $J = 6.9$ , 1 H,  $\text{HC}(\text{C}2)$ ); 3.37 (dq,  $J = 7.2, 5.0$ , 1 H,  $\text{HC}(\text{C}4)$ ); 3.25 (d,  $J = 2.8$ , 1 H, OH); 1.27 (d,  $J = 6.9$ , 3 H,  $\text{H}_3\text{C}(\text{C}1)$ ); 1.05 (d,  $J = 7.2$ , 3 H,  $\text{H}_3\text{C}(\text{C}1'')$ ); 0.90 (s, 9 H,  $\text{H}_3\text{C}(\text{C}3''')$ ); 0.08 (s, 3 H,  $\text{H}_3\text{C}(\text{C}1''')$ ); 0.06 (s, 3 H,  $\text{H}_3\text{C}(\text{C}1''')$ )

TLC:  $R_f$  0.15 (pentane/Et<sub>2</sub>O, 6/1, anisaldehyde)

SFC:  $t_R$  (*2S,4R,5S*)-**8a**, 5.1 min (Daicel Chiralpak AD, 5% MeOH in CO<sub>2</sub>, 150 bar, 40 °C, 3.0 mL min<sup>-1</sup>)

(-)-(2*S*,4*R*,5*S*)-(E)-5-Hydroxy-4-methyl-7-phenyl-2-(((dimethyl)-(1,1-dimethylethyl)silyl)oxy)-6-hepten-3-one (**8b**) [Table 3, entry 3]

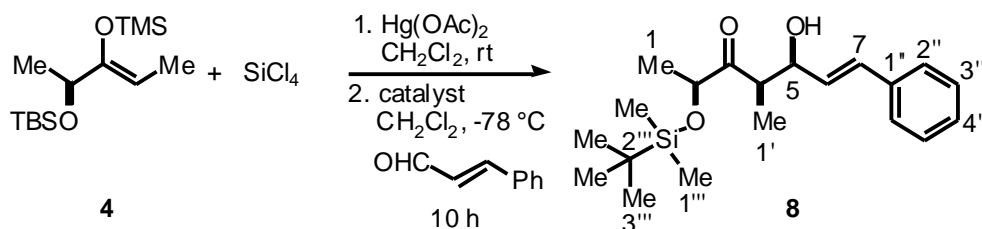

Following General Procedure II: from silyl enol ether **4** (273 mg, 1.0 mmol), silicon tetrachloride (230  $\mu\text{L}$ , 2.0 mmol, 2.0 equiv) and mercuric acetate (3.2 mg, 0.01 mmol, 0.01 equiv) in  $\text{CH}_2\text{Cl}_2$  (1.0 mL) followed by (*R,R*)-**2a** (18 mg, 0.05 mmol, 0.05 equiv) in  $\text{CH}_2\text{Cl}_2$  (2.0 mL) and (*E*)-cinnamaldehyde (130  $\mu\text{L}$ , 1.0 mmol) was obtained after chromatography, 283 mg (81%) of **8b** as a clear, colorless oil. The diastereomeric ratio was determined to be (*syn,syn*)-**8b**/minor isomers, 93/5/2 by SFC analysis.

$^1\text{H}$  NMR: ( $\text{CDCl}_3$ , 500 MHz)

7.40-7.22 (m, 5 H,  $2 \times \text{H}(\text{C}2'')$ ,  $2 \times \text{HC}(\text{C}3'')$ ,  $\text{HC}(\text{C}4'')$ ); 6.66 (dd,  $J = 15.9, 1.5$ , 1 H,  $\text{HC}(\text{C}7)$ ); 6.14 (dd,  $J = 16.1, 5.9$ , 1 H,  $\text{HC}(\text{C}6)$ ); 4.61 (m, 1 H,  $\text{HC}(\text{C}5)$ ); 4.25 (q,  $J = 6.9$ , 1 H,  $\text{HC}(\text{C}2)$ ); 3.31 (dq,  $J = 7.1, 3.4$ , 1 H,  $\text{HC}(\text{C}4)$ ); 3.02, (d,  $J = 2.8$ , 1 H, OH); 1.35 (d,  $J = 6.9$ , 3 H,  $\text{H}_3\text{C}(\text{C}1)$ ); 1.19 (d,  $J = 7.1$ , 3 H,  $\text{H}_3\text{C}(\text{C}1')$ ); 0.93 (s, 9 H,  $\text{H}_3\text{C}(\text{C}3''')$ ); 0.10 (d,  $J = 1.5$ , 6 H,  $\text{H}_3\text{C}(\text{C}1''')$ )

$^{13}\text{C}$  NMR: ( $\text{CDCl}_3$ , 125 MHz)

218.23 (C(3)); 136.72 (C(1'')); 131.01 (C(3'')); 129.01 (C(4'')); 128.55 (C(6)); 127.61 (C(7)); 126.47 (C(4'')); 74.61 (C(2)); 71.90 (C(5)); 45.11 (C(4)); 25.70 (C(3''')); 21.15 (C(1)); 18.03 (C(8)); 10.80 (C(1')); -4.64 (C(1''')); -5.01 (C(1'''))

MS: (FI)

348 ( $\text{M}^+$ , 100), 291 (12), 244 (5), 216 (6), 159 (13), 132 (19)

IR: (neat)

3467 (br), 2931 (s), 2858 (m), 1712 (m), 1462 (m), 1365 (m), 1255 (m), 1124 (m), 835 (s), 779 (s)

TLC:  $R_f$  0.13 (pentane/ $\text{Et}_2\text{O}$ , 6/1, anisaldehyde)

Optical Rotation:  $[\alpha]_{\text{D}}^{23} -17.8^\circ$  ( $c = 1.00$ ,  $\text{CHCl}_3$ )

SFC:  $t_R$  (2*S*,4*R*,5*S*)-**8b**, 5.7 min (Daicel Chiralpak AD, 1% MeOH in  $\text{CO}_2$ , 150 bar, 40 °C, 3.0 mL min<sup>-1</sup>)

Analysis:  $\text{C}_{20}\text{H}_{32}\text{O}_3\text{Si}$  (348.56)

Calculated: C, 68.92; H, 9.25%

Found: C, 68.75; H, 9.20%

(-)-(2*S*,4*R*,5*S*)-(*E*)-5-Hydroxy-4-methyl-7-phenyl-2-[[[(dimethyl)-(1,1-dimethylethyl)silyl]oxy]-6-hepten-3-one (**8b**) [Table 3, entry 4]

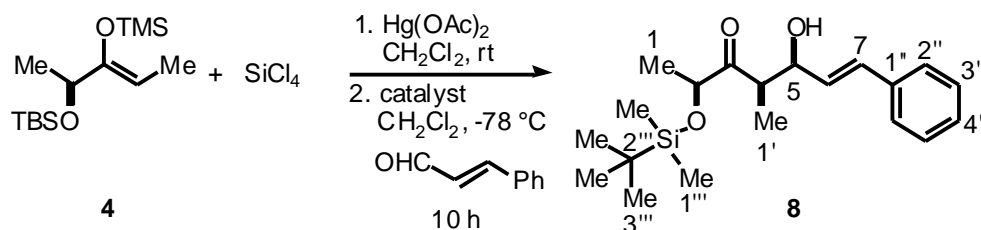

Following General Procedure II: from silyl enol ether **4** (273 mg, 1.0 mmol), silicon tetrachloride (230  $\mu\text{L}$ , 2.0 mmol, 2.0 equiv) and mercuric acetate (3.2 mg, 0.01 mmol, 0.01 equiv) in  $\text{CH}_2\text{Cl}_2$  (1.0 mL) followed by HMPA (26  $\mu\text{g}$ , 0.15 mmol, 0.15 equiv) in  $\text{CH}_2\text{Cl}_2$  (2.0 mL) and (*E*)-cinnamaldehyde (130  $\mu\text{L}$ , 1.0 mmol) was obtained after chromatography, 279 mg (79%) of **8b** as a clear, colorless oil. The diastereomeric ratio was determined to be (*syn*,*syn*)-**8b**/minor isomers, 91/6/3 by SFC analysis.

$^1\text{H}$  NMR: ( $\text{CDCl}_3$ , 500 MHz)

7.40-7.22 (m, 5 H,  $2 \times \text{H}(\text{C}2'')$ ,  $2 \times \text{HC}(\text{C}3'')$ ,  $\text{HC}(\text{C}4'')$ ); 6.66 (dd,  $J = 15.9, 1.5$ , 1 H,  $\text{HC}(\text{C}7)$ ); 6.14 (dd,  $J = 16.1, 5.9$ , 1 H,  $\text{HC}(\text{C}6)$ ); 4.61 (m, 1 H,  $\text{HC}(\text{C}5)$ ); 4.25 (q,  $J = 6.9$ , 1 H,  $\text{HC}(\text{C}2)$ ); 3.31 (dq,  $J = 7.1, 3.4$ , 1 H,  $\text{HC}(\text{C}4)$ ); 3.02 (d,  $J = 2.8$ , 1 H, OH); 1.35 (d,  $J = 6.9$ , 3 H,  $\text{H}_3\text{C}(\text{C}1)$ ); 1.19 (d,  $J = 7.1$ , 3 H,  $\text{H}_3\text{C}(\text{C}1')$ ); 0.93 (s, 9 H,  $\text{H}_3\text{C}(\text{C}3''')$ ); 0.10 (d,  $J = 1.5$ , 6 H,  $\text{H}_3\text{C}(\text{C}1''')$ )

TLC:  $R_f$  0.13 (pentane/ $\text{Et}_2\text{O}$ , 6/1, anisaldehyde)

SFC:  $t_R$  (2*S*,4*R*,5*S*)-**8b**, 5.7 min (Daicel Chiralpak AD, 1% MeOH in  $\text{CO}_2$ , 150 bar,  $40\text{ }^\circ\text{C}$ ,  $3.0\text{ mL min}^{-1}$ )



(-)-(2*S*,4*R*,5*S*)-(*E*)-5-Hydroxy-4-methyl-2-(((dimethyl)-(1,1-dimethylethyl)silyl)oxy]-6-octen-3-one (**8c**) [Table 3, entry 5]

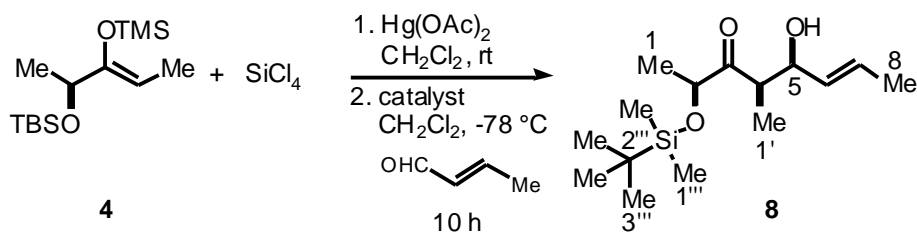

Following General Procedure II: from silyl enol ether **4** (273 mg, 1.0 mmol), silicon tetrachloride (230  $\mu$ L, 2.0 mmol, 2.0 equiv) and mercuric acetate (3.2 mg, 0.01 mmol, 0.01 equiv) in CH<sub>2</sub>Cl<sub>2</sub> (1.0 mL) followed by (*R,R*)-**2a** (18 mg, 0.05 mmol, 0.05 equiv) in CH<sub>2</sub>Cl<sub>2</sub> (2.0 mL) and (*E*)-crotanaldehyde (83  $\mu$ L, 1.0 mmol) was obtained after chromatography, 244 mg (85%) of **8c** as a clear, colorless oil. The diastereomeric ratio was determined to be (*syn*,*syn*)-**8c**/minor isomers, 93/4/3 by SFC analysis.

Analytical data for **8c**:

<sup>1</sup>H NMR: (CDCl<sub>3</sub>, 500 MHz)

5.71 (dq, *J* = 15.2, 6.4, 1 H, HC(7)); 5.44 (ddd, *J* = 15.4, 6.4, 1.7, 1 H, HC(6)); 4.33 (br s, 1 H, HC(5)); 4.22 (q, *J* = 7.1, 1 H, HC(2)); 3.19 (dq, *J* = 7.1, 3.9, 1 H, HC(4)); 2.73, (d, *J* = 2.8, 1 H, OH); 1.71 (d, *J* = 6.4, 3 H, H<sub>3</sub>C(8)); 1.33 (d, *J* = 6.9, 3 H, H<sub>3</sub>C(1)); 1.14 (d, *J* = 7.1, 3 H, H<sub>3</sub>C(1')); 0.92 (s, 9 H, H<sub>3</sub>C(3''')); 0.09 (s, 6 H, H<sub>3</sub>C(1'''))

<sup>13</sup>C NMR: (CDCl<sub>3</sub>, 125 MHz)

218.04 (C(3)); 130.58 (C(6)); 127.78 (C(7)); 74.58 (C(2)); 72.19 (C(5)); 45.11 (C(4)); 25.69 (C(3''')); 21.03 (C(1)); 18.01 (C(8)); 17.75 (C(2''')); 11.01 (C(1')); -4.67 (C(1''')); -5.03 (C(1'''))

MS: (FI)

286 (M<sup>+</sup>, 11), 229 (100), 159 (4), 110 (2)

IR: (neat)

3460 (br), 2956 (m), 2933 (m), 2858 (m), 1712 (m), 1461 (m), 1255 (m), 1120 (m), 966 (m), 935 (m), 835 (s), 777 (m)

TLC:  $R_f$  0.13 (pentane/Et<sub>2</sub>O, 6/1, anisaldehyde)

Optical Rotation:  $[\alpha]_D^{23} -3.7^\circ$  ( $c = 2.00$ , CHCl<sub>3</sub>)

SFC:  $t_R$  (2*S*,4*R*,5*S*)-**8c**, 2.0 min (Daicel Chiralpak AD, 5% MeOH in CO<sub>2</sub>, 150 bar, 40 °C, 2.0 mL min<sup>-1</sup>)

Analysis: C<sub>15</sub>H<sub>30</sub>O<sub>3</sub>Si (286.49)

Calculated: C, 62.89; H, 10.56%

Found: C, 62.64; H, 10.71%

(-)-(2*S*,4*R*,5*S*)-(E)-5-Hydroxy-4-methyl-2-(((dimethyl)-(1,1-dimethylethyl)silyl)oxy]-6-octen-3-one (**8c**) [Table 3, entry 6]

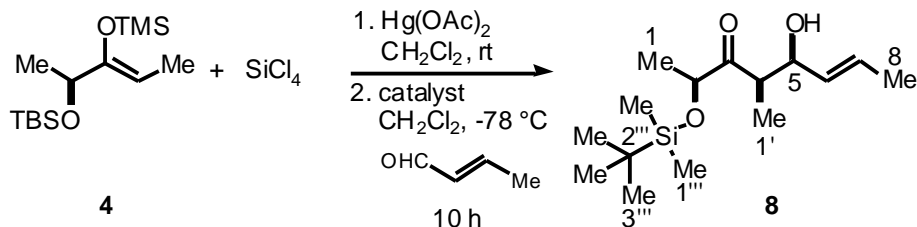

Following General Procedure II: from silyl enol ether **4** (273 mg, 1.0 mmol), silicon tetrachloride (230  $\mu$ L, 2.0 mmol, 2.0 equiv) and mercuric acetate (3.2 mg, 0.01 mmol, 0.01 equiv) in CH<sub>2</sub>Cl<sub>2</sub> (1.0 mL) followed by HMPA (26  $\mu$ L, 0.15 mmol, 0.15 equiv) in CH<sub>2</sub>Cl<sub>2</sub> (2.0 mL) and (*E*)-crotanaldehyde (83  $\mu$ L, 1.0 mmol) was obtained after chromatography, 238 mg (83%) of **8c** as a clear, colorless oil. The diastereomeric ratio was determined to be (*syn,syn*)-**8c**/minor isomers, 84/15/1 by SFC analysis.

Analytical data for **8c**:

<sup>1</sup>H NMR: (CDCl<sub>3</sub>, 500 MHz)

5.71 (dq,  $J = 15.2, 6.4$ , 1 H, HC(7)); 5.44 (ddd,  $J = 15.4, 6.4, 1.7$ , 1 H, HC(6)); 4.33 (br s, 1 H, HC(5)); 4.22 (q,  $J = 7.1$ , 1 H, HC(2)); 3.19 (dq,  $J = 7.1, 3.9$ , 1 H, HC(4)); 2.73, (d,  $J = 2.8$ , 1 H, OH); 1.71 (d,  $J = 6.4$ , 3 H, H<sub>3</sub>C(8)); 1.33 (d,  $J = 6.9$ , 3 H, H<sub>3</sub>C(1)); 1.14 (d,  $J = 7.1$ , 3 H, H<sub>3</sub>C(1')); 0.92 (s, 9 H, H<sub>3</sub>C(3''')); 0.09 (s, 6 H, H<sub>3</sub>C(1'''))

TLC:  $R_f$  0.13 (pentane/Et<sub>2</sub>O, 6/1, anisaldehyde)

SFC:  $t_R$  (2*S*,4*R*,5*S*)-**8c**, 2.0 min (Daicel Chiralpak AD, 5% MeOH in CO<sub>2</sub>, 150 bar, 40 °C, 2.0 mL min<sup>-1</sup>)

(-)-(2*S*,4*R*,5*R*)-5-Hydroxy-4-methyl-7-phenyl-2-(((dimethyl)-(1,1-dimethylethyl)silyl)oxy]-6-heptyn-3-one (**8d**) [Table 3, entry 7]

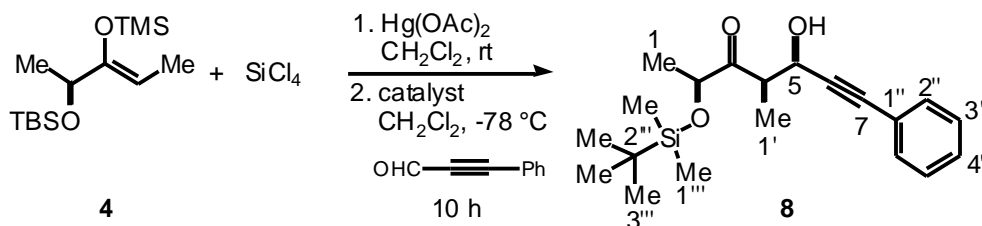

Following General Procedure II: from silyl enol ether **4** (273 mg, 1.0 mmol), silicon tetrachloride (230  $\mu$ L, 2.0 mmol, 2.0 equiv) and mercuric acetate (3.2 mg, 0.01 mmol, 0.01 equiv) in CH<sub>2</sub>Cl<sub>2</sub> (1.0 mL) followed by (*R,R*)-**2a** (18 mg, 0.05 mmol, 0.05 equiv) in CH<sub>2</sub>Cl<sub>2</sub> (2.0 mL) and 3-phenyl propynal<sup>5</sup> (122  $\mu$ L, 1.0 mmol) was obtained after chromatography, 274 mg (79%) of **8d** as a clear, colorless oil. The diastereomeric ratio was determined to be (*syn,syn*)-**8d**/minor isomers, 95/3/2 by SFC analysis.

Analytical data for **8d**:

<sup>1</sup>H NMR: (CDCl<sub>3</sub>, 500 MHz)

7.46-7.26 (m, 5 H, 2  $\times$  H(C2''), 2  $\times$  HC(3''), HC(4'')); 4.92 (t,  $J$  = 4.5, 1 H, HC(5)); 4.31 (q,  $J$  = 6.9, 1 H, HC(2)); 3.41 (dq,  $J$  = 6.9, 4.1, 1 H, HC(4)); 3.01, (d,  $J$  = 4.7, 1 H, OH); 1.41 (d,  $J$  = 6.6, 3 H, H<sub>3</sub>C(1)); 1.41 (d,  $J$  = 6.9, 3 H, H<sub>3</sub>C(1')); 0.96 (s, 9 H, H<sub>3</sub>C(3''')); 0.14 (s, 3 H, H<sub>3</sub>C(1''')); 0.13 (s, 3 H, H<sub>3</sub>C(1'''))

<sup>13</sup>C NMR: (CDCl<sub>3</sub>, 125 MHz)

216.42 (C(3)); 131.77 (CAr); 128.46 (CAr); 128.24 (CAr); 122.47 (C(1'')); 87.79 (C(6)); 85.27 (C(7)); 74.50 (C(2)); 63.54 (C(5)); 46.80 (C(4)); 25.69 (C(3''')); 21.17 (C(1)); 18.02 (C(8)); 18.02 (C(2''')); 11.60 (C(1')); -4.64 (C(1''')); -5.05 (C(1'''))

MS: (FI)346 (M<sup>+</sup>, 1), 289 (100), 216 (1), 187 (2), 159 (7), 145 (5), 130 (2)IR: (neat)

3440 (br), 2954 (s), 2931 (s), 2858 (m), 1714 (m), 1462 (m), 1365 (m), 1255 (m), 1126 (m), 935 (m), 835 (s), 779 (s), 758 (s), 692 (m)

TLC: *R<sub>f</sub>* 0.24 (pentane/Et<sub>2</sub>O, 4/1, anisaldehyde)Optical Rotation: [ $\alpha$ ]<sub>D</sub><sup>23</sup> -1.2° (*c* = 2.00, CHCl<sub>3</sub>)SFC: *t<sub>R</sub>* (2*S*,4*R*,5*S*)-**8d**, 5.7 min (Daicel Chiralpak AD, 2% MeOH in CO<sub>2</sub>, 150 bar, 40 °C, 3.0 mL min<sup>-1</sup>)Analysis: C<sub>20</sub>H<sub>30</sub>O<sub>3</sub>Si (346.54)

Calculated: C, 69.32; H, 8.73%

Found: C, 69.17; H, 8.96%

**(-)-(2*S*,4*R*,5*R*)-5-Hydroxy-4-methyl-7-phenyl-2-(((dimethyl)-(1,1-dimethylethyl)silyl)oxy]-6-heptyn-3-one (**8d**)** [Table 3, entry 8]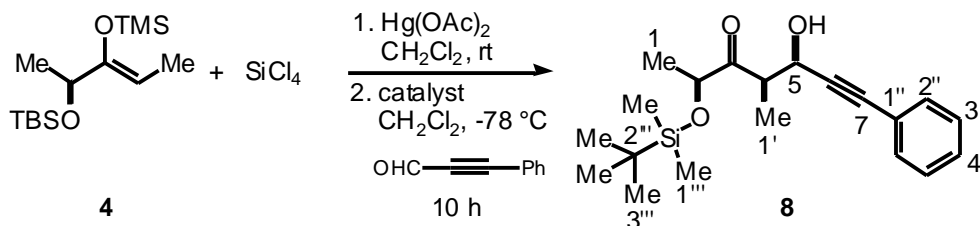

Following General Procedure II: from silyl enol ether **4** (273 mg, 1.0 mmol), silicon tetrachloride (230  $\mu$ L, 2.0 mmol, 2.0 equiv) and mercuric acetate (3.2 mg, 0.01 mmol, 0.01 equiv) in CH<sub>2</sub>Cl<sub>2</sub> (1.0 mL) followed by HMPA (26  $\mu$ L, 0.15 mmol, 0.15 equiv) in CH<sub>2</sub>Cl<sub>2</sub> (2.0 mL) and 3-phenyl propynal (122  $\mu$ L, 1.0 mmol) was obtained after chromatography, 284 mg (82%) of **8d** as a clear, colorless oil. The diastereomeric ratio was determined to be (*syn,syn*)-**8d**/minor isomers, 89/5/4/3 by SFC analysis.

Analytical data for **8d**:<sup>1</sup>H NMR: (CDCl<sub>3</sub>, 500 MHz)

7.46-7.26 (m, 5 H, 2 × H(C2''), 2 × HC(3''), HC(4'')); 4.92 (t, *J* = 4.5, 1 H, HC(5)); 4.31 (q, *J* = 6.9, 1 H, HC(2)); 3.41 (dq, *J* = 6.9, 4.1, 1 H, HC(4)); 3.01, (d, *J* = 4.7, 1 H, OH); 1.41 (d, *J* = 6.6, 3 H, H<sub>3</sub>C(1)); 1.41 (d, *J* = 6.9, 3 H, H<sub>3</sub>C(1')); 0.96 (s, 9 H, H<sub>3</sub>C(3''')); 0.14 (s, 3 H, H<sub>3</sub>C(1''')); 0.13 (s, 3 H, H<sub>3</sub>C(1'''))

TLC: *R<sub>f</sub>* 0.24 (pentane/Et<sub>2</sub>O, 4/1, anisaldehyde)SFC: *t<sub>R</sub>* (2*S*,4*R*,5*S*)-**8d**, 5.7 min (Daicel Chiralpak AD, 2% MeOH in CO<sub>2</sub>, 150 bar, 40 °C, 3.0 mL min<sup>-1</sup>)

(-)-(2*S*,4*R*,5*R*)-5-Hydroxy-4-methyl-5-(1-furyl)-2-(((dimethyl)-(1,1-dimethylethyl)silyl)oxy)-3-pentanone (**8e**) [Table 3, entry 9]

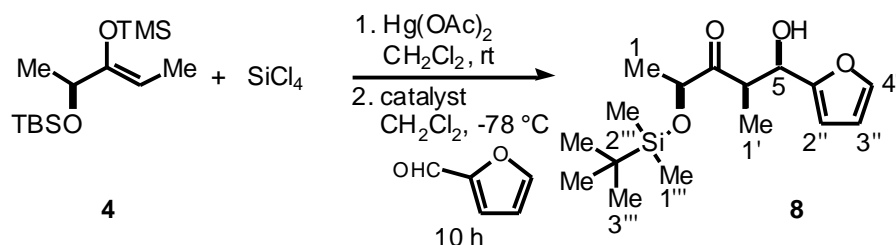

Following General Procedure II: from silyl enol ether **4** (273 mg, 1.0 mmol), silicon tetrachloride (230 μL, 2.0 mmol, 2.0 equiv) and mercuric acetate (3.2 mg, 0.01 mmol, 0.01 equiv) in CH<sub>2</sub>Cl<sub>2</sub> (1.0 mL) followed by (*R,R*)-**2a** (18 mg, 0.05 mmol, 0.05 equiv) in CH<sub>2</sub>Cl<sub>2</sub> (2.0 mL) and 2-furaldehyde (83 μL, 1.0 mmol) was obtained after chromatography, 257 mg (82%) of **8e** as a clear, colorless oil. The diastereomeric ratio was determined to be (*syn,syn*)-**8e**/minor isomers, 94/6 by SFC analysis.

Analytical data for **8e**:<sup>1</sup>H NMR: (CDCl<sub>3</sub>, 500 MHz)

7.34 (d,  $J = 1.7$ , 1 H, HC(4'')); 6.33 (dd,  $J = 3.2, 1.7$ , 1 H, HC(3'')); 6.27 (d,  $J = 3.2$ , 1 H, HC(2'')); 5.03 (t,  $J = 4.1$ , 1 H, HC(5)); 4.20 (q,  $J = 7.1$ , 1 H, HC(2)); 3.58 (dq,  $J = 7.1, 4.1$ , 1 H, HC(4)); 2.95, (d,  $J = 3.6$ , 1 H, OH); 1.31 (d,  $J = 6.6$ , 3 H, H<sub>3</sub>C(1)); 1.18 (d,  $J = 7.2$ , 3 H, H<sub>3</sub>C(1')); 0.95 (s, 9 H, H<sub>3</sub>C(3''')); 0.12 (s, 3 H, H<sub>3</sub>C(1'')); 0.11 (s, 3 H, H<sub>3</sub>C(1'''))

<sup>13</sup>C NMR: (CDCl<sub>3</sub>, 125 MHz)

217.59 (C(3)); 154.38 (C(1'')); 141.65 (C(4'')); 110.25 (C(3'')); 106.62 (C(2'')); 74.36 (C(2)); 68.27 (C(5)); 44.74 (C(4)); 25.66 (C(3''')); 21.02 (C(1)); 18.00 (C(2''')); 11.34 (C(1')); -4.70 (C(1'')); -5.11 (C(1'''))

MS: (FI)

312.2 (M<sup>+</sup>, 44), 255.1 (100), 208.6 (8), 159.1 (16), 96.0 (6)

IR: (neat)

3467 (br), 2956 (m), 2933 (m), 2858 (m), 1714 (m), 1255 (m), 1126 (m), 1006 (m), 931 (m), 835 (s), 779 (m)

TLC:  $R_f$  0.13 (pentane/Et<sub>2</sub>O, 6/1, anisaldehyde)Optical Rotation:  $[\alpha]_D^{23} -1.2^\circ$  ( $c = 2.00$ , CHCl<sub>3</sub>)

SFC:  $t_R$  (2*S*,4*R*,5*R*)-**8e**, 4.0 min (Daicel Chiralpak AD, 1.5% MeOH in CO<sub>2</sub>, 150 bar, 40 °C, 2.5 mL min<sup>-1</sup>)

Analysis: C<sub>16</sub>H<sub>28</sub>O<sub>3</sub>Si (312.48)

Calculated: C, 61.50; H, 9.03%

Found: C, 61.30; H, 9.04%

**(-)-(2*S*,4*R*,5*R*)-5-Hydroxy-4-methyl-5-(1-furyl)-2-(((dimethyl)-(1,1-dimethylethyl)silyl)oxy)-3-pentanone (8e)** [Table 3, entry 10]

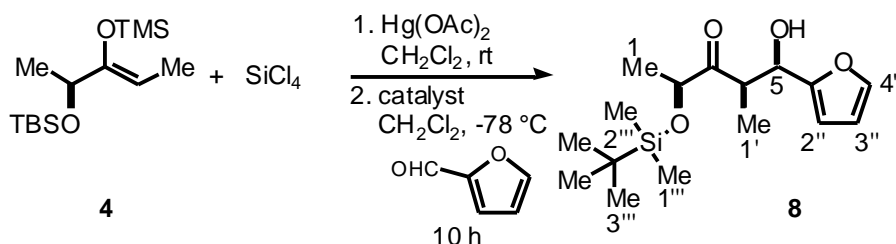

Following the General Procedure II: from silyl enol ether **4** (273 mg, 1.0 mmol), silicon tetrachloride (230  $\mu\text{L}$ , 2.0 mmol, 2.0 equiv) and mercuric acetate (3.2 mg, 0.01 mmol, 0.01 equiv) in  $\text{CH}_2\text{Cl}_2$  (1.0 mL) followed by HMPA (26  $\mu\text{L}$ , 0.15 mmol, 0.15 equiv) in  $\text{CH}_2\text{Cl}_2$  (2.0 mL) and 2-furaldehyde (83  $\mu\text{L}$ , 1.0 mmol) was obtained after chromatography, 225 mg (72%) of **8e** as a clear, colorless oil. The diastereomeric ratio was determined to be (*syn,syn*)-**8e**/minor isomers, 93/5/1 by SFC analysis.

Analytical data for **8e**:

$^1\text{H}$  NMR: ( $\text{CDCl}_3$ , 500 MHz)

7.34 (d,  $J = 1.7$ , 1 H, HC(4'')); 6.33 (dd,  $J = 3.2$ , 1.7, 1 H, HC(3'')); 6.27 (d,  $J = 3.2$ , 1 H, HC(2'')); 5.03 (t,  $J = 4.1$ , 1 H, HC(5)); 4.20 (q,  $J = 7.1$ , 1 H, HC(2)); 3.58 (dq,  $J = 7.1$ , 4.1, 1 H, HC(4)); 2.95, (d,  $J = 3.6$ , 1 H, OH); 1.31 (d,  $J = 6.6$ , 3 H,  $\text{H}_3\text{C}(1)$ ); 1.18 (d,  $J = 7.2$ , 3 H,  $\text{H}_3\text{C}(1')$ ); 0.95 (s, 9 H,  $\text{H}_3\text{C}(3''')$ ); 0.12 (s, 3 H,  $\text{H}_3\text{C}(1''')$ ); 0.11 (s, 3 H,  $\text{H}_3\text{C}(1''')$ )

TLC:  $R_f$  0.13 (pentane/ $\text{Et}_2\text{O}$ , 6/1, anisaldehyde)

SFC:  $t_R$  (2*S*,4*R*,5*R*)-**8e**, 4.0 min (Daicel Chiralpak AD, 1.5% MeOH in  $\text{CO}_2$ , 150 bar,  $40^\circ\text{C}$ ,  $2.5\text{ mL min}^{-1}$ )

**(+)-(2*S*,4*R*,5*R*)-5-Hydroxy-4-methyl-5-(1-naphthyl)-2-(((dimethyl)-(1,1-dimethylethyl)silyl)oxy)-3-pentanone (8f)** [Table 3, entry 11]

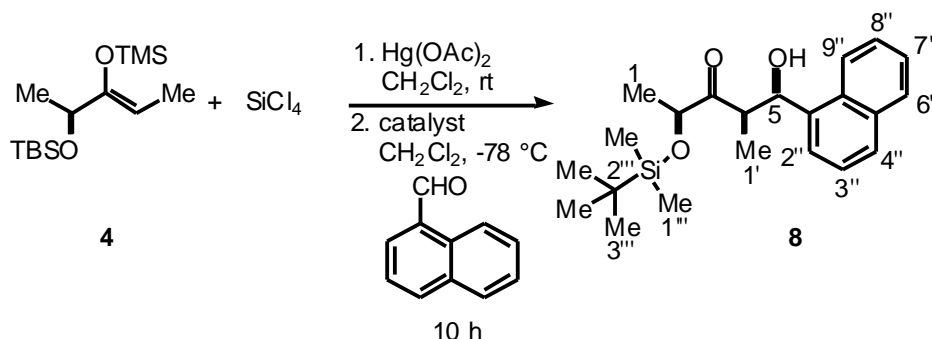

Following General Procedure II: from silyl enol ether **4** (273 mg, 1.0 mmol), silicon tetrachloride (230  $\mu$ L, 2.0 mmol, 2.0 equiv) and mercuric acetate (3.2 mg, 0.01 mmol, 0.01 equiv) in  $\text{CH}_2\text{Cl}_2$  (1.0 mL) followed by (*R,R*)-**2a** (18 mg, 0.05 mmol, 0.05 equiv) in  $\text{CH}_2\text{Cl}_2$  (2.0 mL) and 1-naphthaldehyde (135  $\mu$ L, 1.0 mmol) was obtained after chromatography, 270 mg (72%) of **8f** as a clear, colorless oil. The diastereomeric ratio was determined to be (*syn, syn*)-**8f**/minor isomers, 98/1/1 by SFC analysis.

Analytical data for **8f**:

$^1\text{H}$  NMR: ( $\text{CDCl}_3$ , 500 MHz)

7.90-7.44 (m, 7 H, HC(2''), HC(3''), HC(4''), HC(6''), HC(7''), HC(8''), HC(9'')); 5.88 (br s, 1 H, HC(5)); 4.27 (q,  $J = 6.9$ , 1 H, HC(2)); 3.70 (d,  $J = 1.9$ , 1 H, OH); 3.59, (dq,  $J = 7.3$ , 2.8, 1 H, HC(4)); 1.35 (d,  $J = 6.9$ , 3 H,  $\text{H}_3\text{C}(1)$ ); 1.05 (d,  $J = 7.3$ , 3 H,  $\text{H}_3\text{C}(1')$ ); 0.86 (s, 9 H,  $\text{H}_3\text{C}(3''')$ ); 0.10 (d,  $J = 1.9$ , 6 H,  $\text{H}_3\text{C}(1''')$ )

$^{13}\text{C}$  NMR: ( $\text{CDCl}_3$ , 125 MHz)

219.51 (C(3)); 136.45 (C(1'')); 133.72 (C(5'')); 129.70 (C(10'')); 129.08 (CAr); 127.71 (CAr); 125.96 (CAr); 125.36 (CAr); 125.29 (CAr); 124.43 (CAr); 122.61 (CAr); 74.77 (C(2)); 69.38 (C(5)); 45.16 (C(4)); 25.70 (C(3''')); 21.35 (C(1)); 18.06 (C(2''')); 10.19 (C(1')); -4.75 (C(1''')); -4.97 (C(1'''))

MS: (FI)

372.3 ( $\text{M}^+$ , 100), 315.2 (6), 266.7 (12), 216.2 (5), 156.1 (16)



IR: (neat)

3502 (br), 2931 (m), 2958 (m), 1699 (m), 1255 (m), 1128 (m), 837 (s), 777 (s)

TLC:  $R_f$  0.19 (pentane/Et<sub>2</sub>O, 6/1, anisaldehyde)

Optical Rotation:  $[\alpha]_D^{23} +53.1^\circ$  ( $c = 1.00$ , CHCl<sub>3</sub>)

SFC:  $t_R$  (2*S*,4*R*,5*R*)-**8f**, 2.8 min (Daicel Chiralpak AS, 4% MeOH in CO<sub>2</sub>, 150 bar, 40 °C, 3.0 mL min<sup>-1</sup>)

Analysis: C<sub>22</sub>H<sub>32</sub>O<sub>3</sub>Si (372.58)

Calculated: C, 70.92; H, 8.66%

Found: C, 70.78; H, 8.42%

(+)-(2*S*,4*R*,5*R*)-5-Hydroxy-4-methyl-5-(1-naphthyl)-2-[[[(dimethyl)-(1,1-dimethylethyl)silyl]oxy]-3-pentanone (**8f**) [Table 3, entry 12]

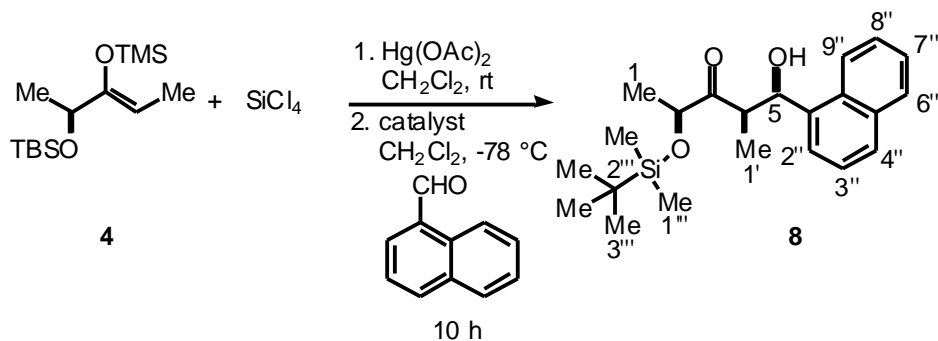

Following General Procedure II: from silyl enol ether **4** (273 mg, 1.0 mmol), silicon tetrachloride (230  $\mu$ L, 2.0 mmol, 2.0 equiv) and mercuric acetate (3.2 mg, 0.01 mmol, 0.01 equiv) in CH<sub>2</sub>Cl<sub>2</sub> (1.0 mL) followed by HMPA (26  $\mu$ L, 0.15 mmol, 0.15 equiv) in CH<sub>2</sub>Cl<sub>2</sub> (2.0 mL) and 1-naphthaldehyde (135  $\mu$ L, 1.0 mmol) was obtained after chromatography, 231 mg (62%) of **8f** as a clear, colorless oil. The diastereomeric ratio was determined to be (*syn, syn*)-**8f**/minor isomers, 83/12/3/1 by SFC analysis.

Analytical data for **8f**:<sup>1</sup>H NMR: (CDCl<sub>3</sub>, 500 MHz)

7.90-7.44 (m, 7 H, HC(2''), HC(3''), HC(4''), HC(6''), HC(7''), HC(8''), HC(9'')); 5.88 (br s, 1 H, HC(5'')); 4.27 (q, *J* = 6.9, 1 H, HC(2)); 3.70 (d, *J* = 1.9, 1 H, OH); 3.59, (dq, *J* = 7.3, 2.8, 1 H, HC(4)); 1.35 (d, *J* = 6.9, 3 H, H<sub>3</sub>C(1)); 1.05 (d, *J* = 7.3, 3 H, H<sub>3</sub>C(1'')); 0.86 (s, 9 H, H<sub>3</sub>C(3''')); 0.10 (d, *J* = 1.9, 6 H, H<sub>3</sub>C(1'''))

TLC: *R<sub>f</sub>* 0.19 (pentane/Et<sub>2</sub>O, 6/1, anisaldehyde)SFC: *t<sub>R</sub>* (2*S*,4*R*,5*R*)-**8f**, 2.8 min (Daicel Chiralpak AS, 4% MeOH in CO<sub>2</sub>, 150 bar, 40 °C, 3.0 mL min<sup>-1</sup>)

(-)-(2*S*,4*R*,5*R*)-5-Hydroxy-4-methyl-5-(2-naphthyl)-2-(((dimethyl)-(1,1-dimethylethyl)silyl)oxy)-3-pentanone (**8g**) [Table 3, entry 13]

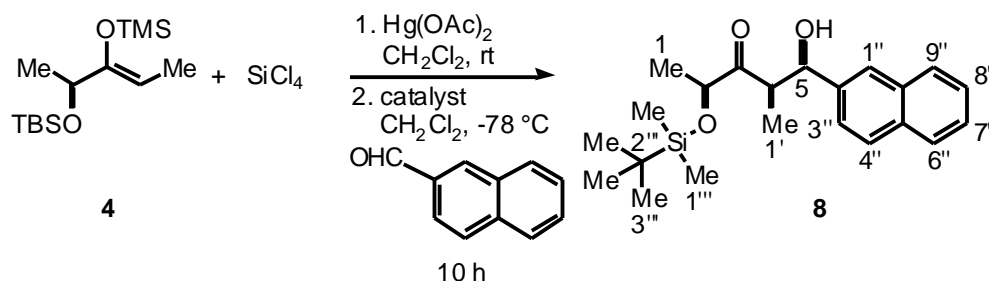

Following General Procedure II: from silyl enol ether **4** (273 mg, 1.0 mmol), silicon tetrachloride (230 µL, 2.0 mmol, 2.0 equiv) and mercuric acetate (3.2 mg, 0.01 mmol, 0.01 equiv) in CH<sub>2</sub>Cl<sub>2</sub> (1.0 mL) followed by (*R,R*)-**2a** (18 mg, 0.05 mmol, 0.05 equiv) in CH<sub>2</sub>Cl<sub>2</sub> (2.0 mL) and 2-naphthaldehyde (156 mg, 1.0 mmol) was obtained after chromatography, 265 mg (71%) of **8g** as a clear, colorless oil. The diastereomeric ratio was determined to be (*syn, syn*)-**8g**/minor isomers, 94/3/3 by SFC analysis.

Analytical data for **8g**:<sup>1</sup>H NMR: (CDCl<sub>3</sub>, 500 MHz)

7.86-7.36 (m, 7 H, HC(1''), HC(3''), HC(4''), HC(6''), HC(7''), HC(8''), HC(9'')); 5.23 (br s, 1 H, HC(5)); 4.21 (q,  $J = 6.9$ , 1 H, HC(2)); 3.51 (dq,  $J = 7.1$ , 3.2, 1 H, HC(4)); 3.46, (d,  $J = 1.9$ , 1 H, OH); 1.32 (d,  $J = 6.9$ , 3 H, H<sub>3</sub>C(1)); 1.09 (d,  $J = 7.1$ , 3 H, H<sub>3</sub>C(1')); 0.93 (s, 9 H, H<sub>3</sub>C(3''')); 0.11 (s, 3 H, H<sub>3</sub>C(1''')); 0.09 (s, 3 H, H<sub>3</sub>C(1'''))

<sup>13</sup>C NMR: (CDCl<sub>3</sub>, 125 MHz)

219.11 (C(3)); 139.04 (C(2'')); 133.23 (C(10'')); 132.73 (C(5'')); 128.05 (CAr); 127.92 (CAr); 127.60 (CAr); 126.08 (CAr); 125.75 (CAr); 124.87 (CAr); 123.91 (CAr); 74.63 (C(2)); 72.77 (C(5)); 46.58 (C(4)); 25.68 (C(3''')); 21.15 (C(1)); 18.01 (C(2''')); 10.21 (C(1')); -4.70 (C(1''')); -5.01 (C(1'''))

MS: (FI)

372.2 (M<sup>+</sup>, 100), 315.2 (8), 266.9 (15), 216.2 (4), 156.1 (10)

IR: (neat)

3487 (br), 2954 (m), 2931 (m), 2858 (m), 1711 (m), 1462 (m), 1363 (m), 1255 (m), 1124 (m), 935 (m), 835 (s), 779 (m), 735 (m)

TLC:  $R_f$  0.26 (pentane/Et<sub>2</sub>O, 4/1, anisaldehyde)Optical Rotation:  $[\alpha]_D^{23} -1.7^\circ$  ( $c = 2.00$ , CHCl<sub>3</sub>)

SFC:  $t_R$  (2*S*,4*R*,5*R*)-**8g**, 2.5 min (Daicel Chiralpak AS, 4% MeOH in CO<sub>2</sub>, 150 bar, 40 °C, 3.0 mL min<sup>-1</sup>)

Analysis: C<sub>22</sub>H<sub>32</sub>O<sub>3</sub>Si (372.58)

Calculated: C, 70.92; H, 8.66%

Found: C, 70.62; H, 8.78%

(-)-(2*S*,4*R*,5*R*)-5-Hydroxy-4-methyl-5-(2-naphthyl)-2-(((dimethyl)-(1,1-dimethylethyl)silyl)oxy)-3-pentanone (**8g**) [Table 3, entry 14]

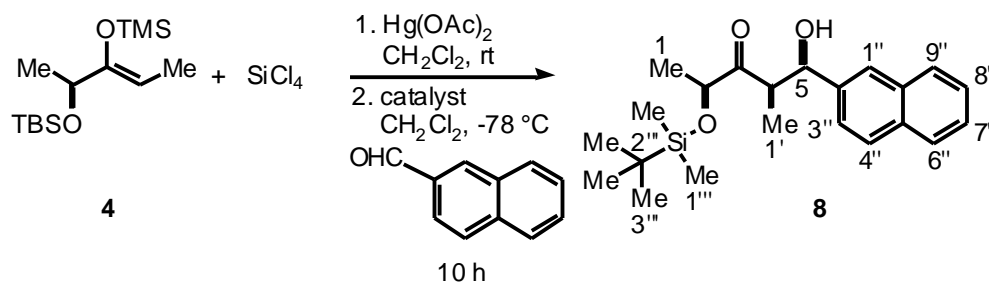

Following General Procedure II: from silyl enol ether **4** (273 mg, 1.0 mmol), silicon tetrachloride (230  $\mu$ L, 2.0 mmol, 2.0 equiv) and mercuric acetate (3.2 mg, 0.01 mmol, 0.01 equiv) in  $\text{CH}_2\text{Cl}_2$  (1.0 mL) followed by HMPA (26  $\mu$ L, 0.15 mmol, 0.15 equiv) in  $\text{CH}_2\text{Cl}_2$  (2.0 mL) and 2-naphthaldehyde (156 mg, 1.0 mmol) was obtained after chromatography, 220 mg (59%) of **8g** as a clear, colorless oil. The diastereomeric ratio was determined to be (*syn, syn*)-**8g**/minor isomers, 89/6/4/1 by SFC analysis.

Analytical data for **8g**:

$^1\text{H}$  NMR: ( $\text{CDCl}_3$ , 500 MHz)

7.86-7.36 (m, 7 H, HC(1''), HC(3''), HC(4''), HC(6''), HC(7''), HC(8''), HC(9'')); 5.23 (br s, 1 H, HC(5'')); 4.21 (q,  $J = 6.9$ , 1 H, HC(2'')); 3.51 (dq,  $J = 7.1$ , 3.2, 1 H, HC(4'')); 3.46, (d,  $J = 1.9$ , 1 H, OH); 1.32 (d,  $J = 6.9$ , 3 H,  $\text{H}_3\text{C}(1)$ ); 1.09 (d,  $J = 7.1$ , 3 H,  $\text{H}_3\text{C}(1')$ ); 0.93 (s, 9 H,  $\text{H}_3\text{C}(3''')$ ); 0.11 (s, 3 H,  $\text{H}_3\text{C}(1''')$ ); 0.09 (s, 3 H,  $\text{H}_3\text{C}(1''')$ )

TLC:  $R_f$  0.26 (pentane/ $\text{Et}_2\text{O}$ , 4/1, anisaldehyde)

SFC:  $t_R$  (2*S*,4*R*,5*R*)-**8g**, 2.5 min (Daicel Chiralpak AS, 4% MeOH in  $\text{CO}_2$ , 150 bar, 40  $^\circ\text{C}$ , 3.0 mL min $^{-1}$ )

**References**

- (1) Berger Instruments, Inc., 123A Sandy Drive, Newark, Delaware 19713, U.S.A.
- (2) Paterson, I; Wallace, D. J.; Cowden, C. J. *Synthesis* **1998**, 639.
- (3) Luke, G. P.; Morris, J. J. *J. Org. Chem.* **1995**, *60*, 3013.
- (4) Lohray, B. B.; Enders, D. *Helv. Chim. Acta* **1989**, *72*, 980.
- (5) Journet, M.; Cai, D.; DiMichele L. M.; Larsen, R. D. *Tetrahedron Lett.* **1998**, *39*, 6427.
- (6) Denmark, S. E.; Su, X.; Nishigaichi, Y.; Coe, D. M.; Wong, K.-T.; Winter, S. B. D.; Choi, J. *J. Org. Chem.* **1999**, *64*, 1958.
- (7) Galobardes, M.; Gascón, M.; Mena, M.; Romea, P.; Urpí, F.; Vilarrasa, J. *Org. Lett.* **2000**, *2*, 2599.
